# Supplementary material for: Conceptualising the Integration of Strategies by Clinical Commissioning Groups in England Towards the Antibiotic Prescribing Targets for the Quality Premium Financial Incentive Scheme: A Short Report
Source: MDPI journal article supplement (doi:10.3390/antibiotics9020044), 2020-01-23
Supplement: s1 [file s1]

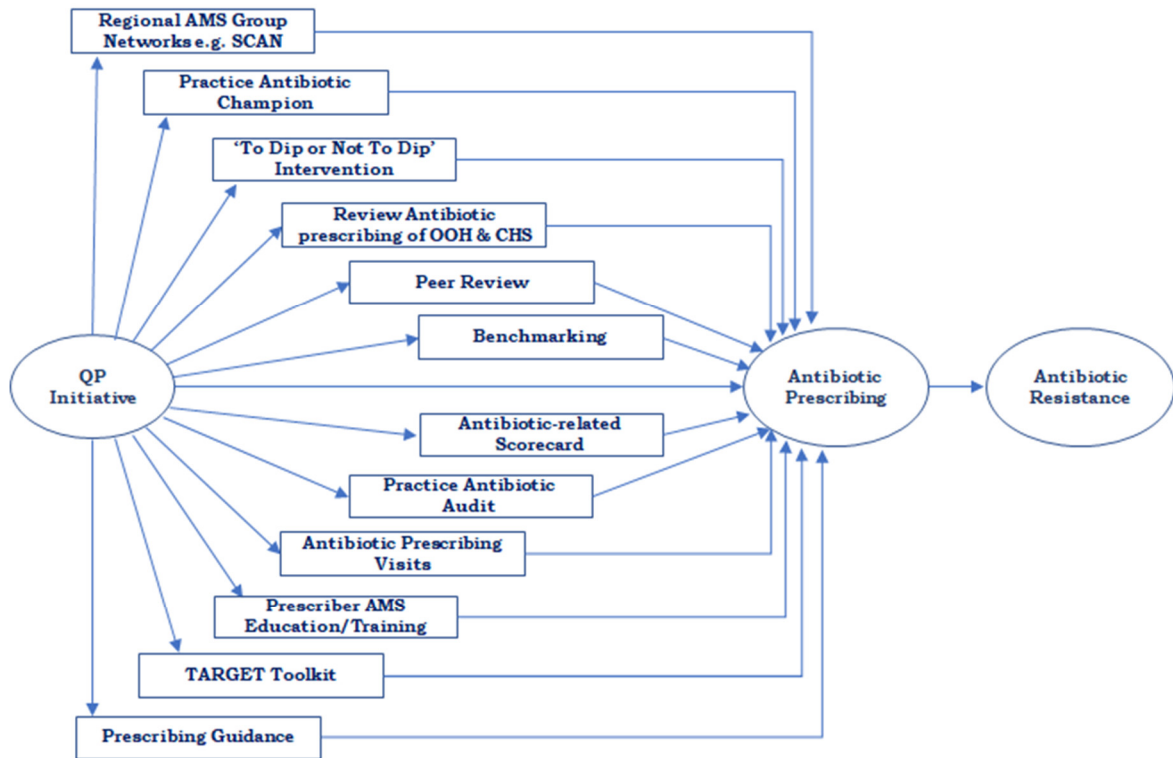

Supplementary Material 1:  
Conceptual model developed by Group 1

Figure S1: Initial Conceptual Model Group 1

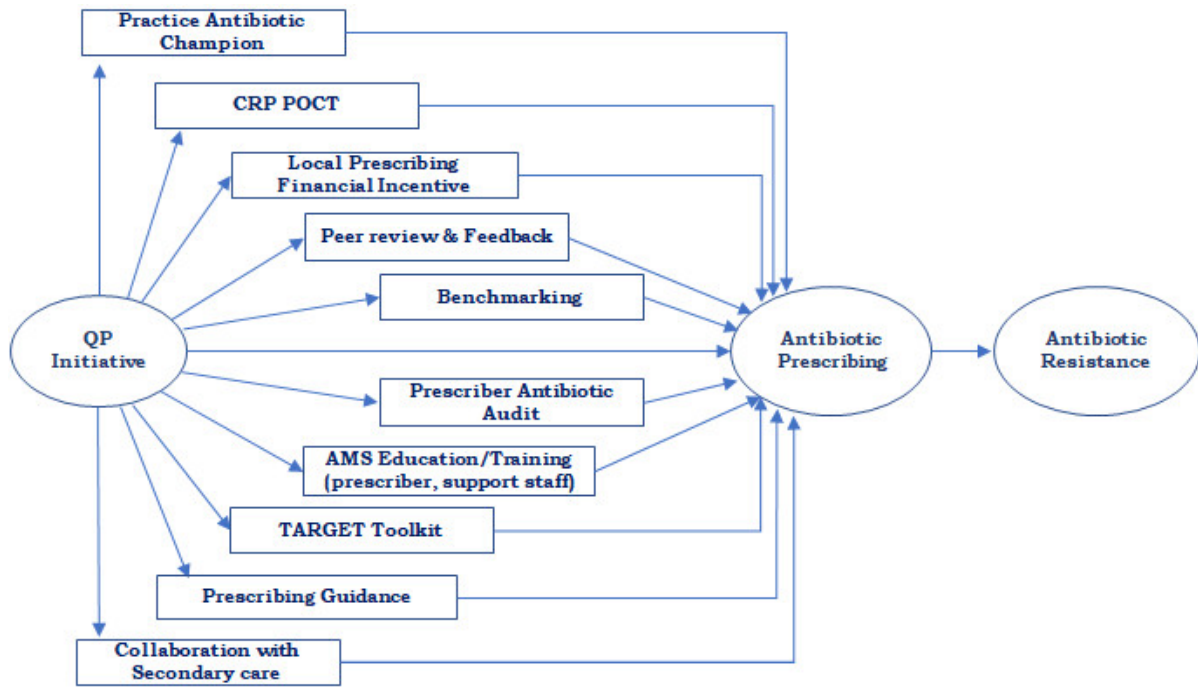

*Supplementary Material 2:  
Conceptual model developed by Group 2*

, Figure S2: Initial Conceptual Model Group 2,

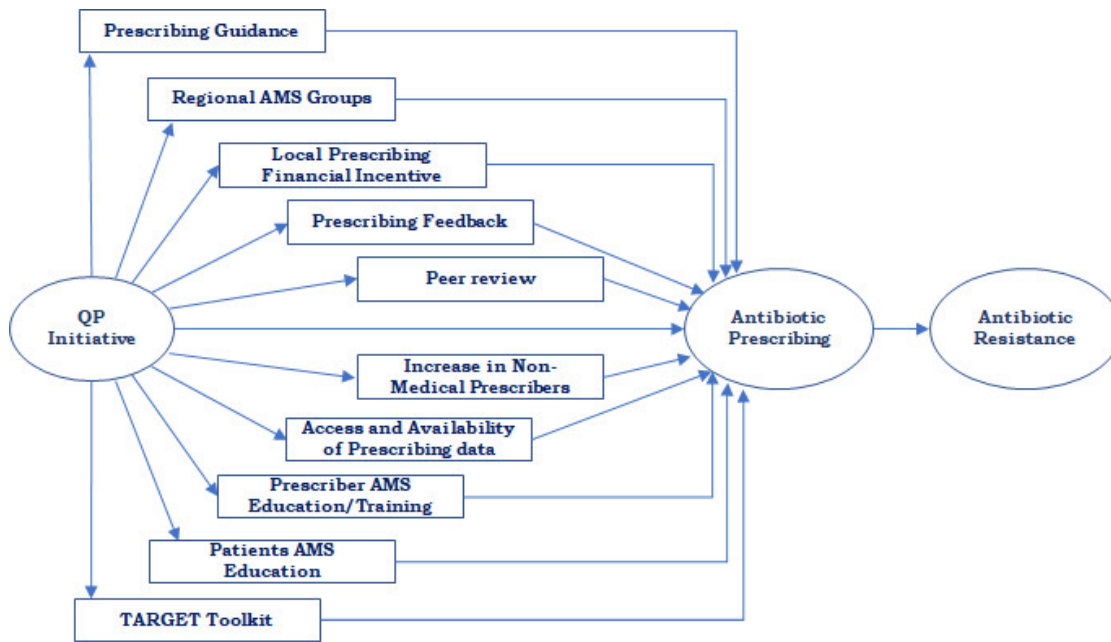

*Supplementary Material 3:  
Conceptual model developed by Group 3*

Figure S3: Initial Conceptual Model Group
